# Supplementary material
Source: publisher figshare collection journal article supplement (https://frontiersin.figshare.com/ndownloader/files/18947771)

## Appendix

Table A1 Descriptive statistics of explanatory variables of interests (frequency and proportion)

| Variable of interest                                                                 | Outcome       | Frequency (%) |
|--------------------------------------------------------------------------------------|---------------|---------------|
| Gender                                                                               | M:            | 1,212 (80.7%) |
|                                                                                      | F:            | 290 (19.3%)   |
|                                                                                      | <35:          | 79 (5.3%)     |
|                                                                                      | 36-44:        | 156 (10.4%)   |
| Age                                                                                  | 45-54:        | 425 (28.3%)   |
|                                                                                      | 55-64:        | 466 (31.0%)   |
|                                                                                      | Over 65:      | 376 (25.0%)   |
|                                                                                      | School:       | 751 (50.0%)   |
| Educational level                                                                    | College:      | 486 (32.4%)   |
|                                                                                      | Uni/Higher:   | 265 (17.6%)   |
|                                                                                      | Tenant:       | 362 (24.1%)   |
|                                                                                      | Tenant&Owner: | 190 (12.6%)   |
| Tenure status                                                                        | Owner:        | 895 (59.6%)   |
|                                                                                      | Manager:      | 55 (3.7%)     |
|                                                                                      | <5:           | 76 (5.1%)     |
|                                                                                      | [5-10]:       | 87 (5.8%)     |
| Number of years of having been involved in the business/holding?                     | (10-20):      | 227 (15.1%)   |
|                                                                                      | >20:          | 1,112 (74.0%) |
|                                                                                      | None:         | 737 (49.1%)   |
|                                                                                      | 1-3:          | 649 (43.2%)   |
| Number of people employed on this land                                               | 4 or more:    | 116 (7.7%)    |
|                                                                                      | Yes:          | 623 (41.5%)   |
|                                                                                      | No:           | 879 (58.5%)   |
|                                                                                      | Yes:          | 80 (5.3%)     |
| Until 2020 are you planning to remain/become involved in agri-environmental schemes? | No:           | 1,407 (93.7%) |
|                                                                                      | Conversion:   | 15 (1%)       |
|                                                                                      | Yes:          | 80 (5.3%)     |
|                                                                                      | No:           | 879 (58.5%)   |
| Are you certified organic?                                                           | Yes:          | 80 (5.3%)     |
|                                                                                      | No:           | 1,407 (93.7%) |
|                                                                                      | Conversion:   | 15 (1%)       |
|                                                                                      | Yes:          | 80 (5.3%)     |

|                                                                                                               |                |                  |
|---------------------------------------------------------------------------------------------------------------|----------------|------------------|
|                                                                                                               | FT:            | 977<br>(65.0%)   |
| Are you full time/part time/hobby farmer/other?                                                               | PT:            | 330<br>(22.0%)   |
|                                                                                                               | Hobby:         | 106 (7.1%)       |
|                                                                                                               | Other:         | 89 (5.9%)        |
|                                                                                                               | No:            | 332<br>(22.1%)   |
| Have you identified a potential successor who will eventually take over the management of your farm business? | Unsure:        | 426<br>(28.4%)   |
|                                                                                                               | Yes:           | 744<br>(49.5%)   |
|                                                                                                               | 0%:            | 100 (6.7%)       |
|                                                                                                               | (0-25%):       | 183<br>(12.2%)   |
| How much of your total income from this business/holding is from agriculture?                                 | [25%-50%]:     | 209<br>(13.9%)   |
|                                                                                                               | (50-75%):      | 232<br>(15.4%)   |
|                                                                                                               | >75%:          | 778<br>(51.8%)   |
| Since 2005 have any of the following changed the way you manage your business/holdings?                       |                |                  |
|                                                                                                               | No:            | 682<br>(45.4%)   |
| Changes in technology                                                                                         | Slightly:      | 554<br>(36.9%)   |
|                                                                                                               | Significantly: | 266<br>(17.7%)   |
|                                                                                                               | No:            | 1,199<br>(79.8%) |
| Succession planning                                                                                           | Slightly:      | 243<br>(16.2%)   |
|                                                                                                               | Significantly: | 60 (4.0%)        |
|                                                                                                               | No:            | 1,028<br>(68.4%) |
| Access to advice/information on new opportunities                                                             | Slightly:      | 350<br>(23.3%)   |
|                                                                                                               | Significantly: | 124 (8.3%)       |
|                                                                                                               | No:            | 777<br>(51.7%)   |
| Changes in animal welfare regulations and policies                                                            | Slightly:      | 463<br>(30.8%)   |
|                                                                                                               | Significantly: | 262<br>(17.5%)   |
|                                                                                                               | 1=easy:        | 347<br>(23.1%)   |
| How difficult do you find investing in new technologies?<br>(from easy to difficult)                          | 2:             | 310<br>(20.6%)   |
|                                                                                                               | 3:             | 514<br>(34.2%)   |

|                                                                                                                                                                |                      |                  |
|----------------------------------------------------------------------------------------------------------------------------------------------------------------|----------------------|------------------|
|                                                                                                                                                                | 4:                   | 262<br>(17.5%)   |
|                                                                                                                                                                | 5=difficult:         | 69 (4.6%)        |
| Do you receive SFP?                                                                                                                                            | No:                  | 281<br>(18.7%)   |
|                                                                                                                                                                | Yes:                 | 1,221<br>(81.3%) |
|                                                                                                                                                                | Never:               | 481<br>(32.0%)   |
| How often do you look for information on EID for farm management?                                                                                              | Weekly:              | 331<br>(22.0%)   |
|                                                                                                                                                                | Monthly:             | 485<br>(32.3%)   |
|                                                                                                                                                                | Yearly:              | 305<br>(13.7%)   |
|                                                                                                                                                                | Never:               | 506<br>(33.7%)   |
| How often do you look for information on cattle surveillance through British Cattle Movement Service?                                                          | Weekly:              | 376<br>(25.0%)   |
|                                                                                                                                                                | Monthly:             | 500<br>(33.3%)   |
|                                                                                                                                                                | Yearly:              | 120 (8.0%)       |
|                                                                                                                                                                | 1=Strongly Disagree: | 22 (1.5%)        |
| How much do you agree that since 2005 you have improved the welfare of your animals through new knowledge or technology? (strongly disagree to strongly agree) | 2=Disagree:          | 194<br>(12.9%)   |
|                                                                                                                                                                | 3=Neither:           | 140 (9.3%)       |
|                                                                                                                                                                | 4=Agree:             | 9 09<br>(60.5%)  |
|                                                                                                                                                                | 5=Strongly Agree:    | 237<br>(15.8%)   |

---

Fig A1 The characteristics of latent classes of the LC classification model with four-class solution

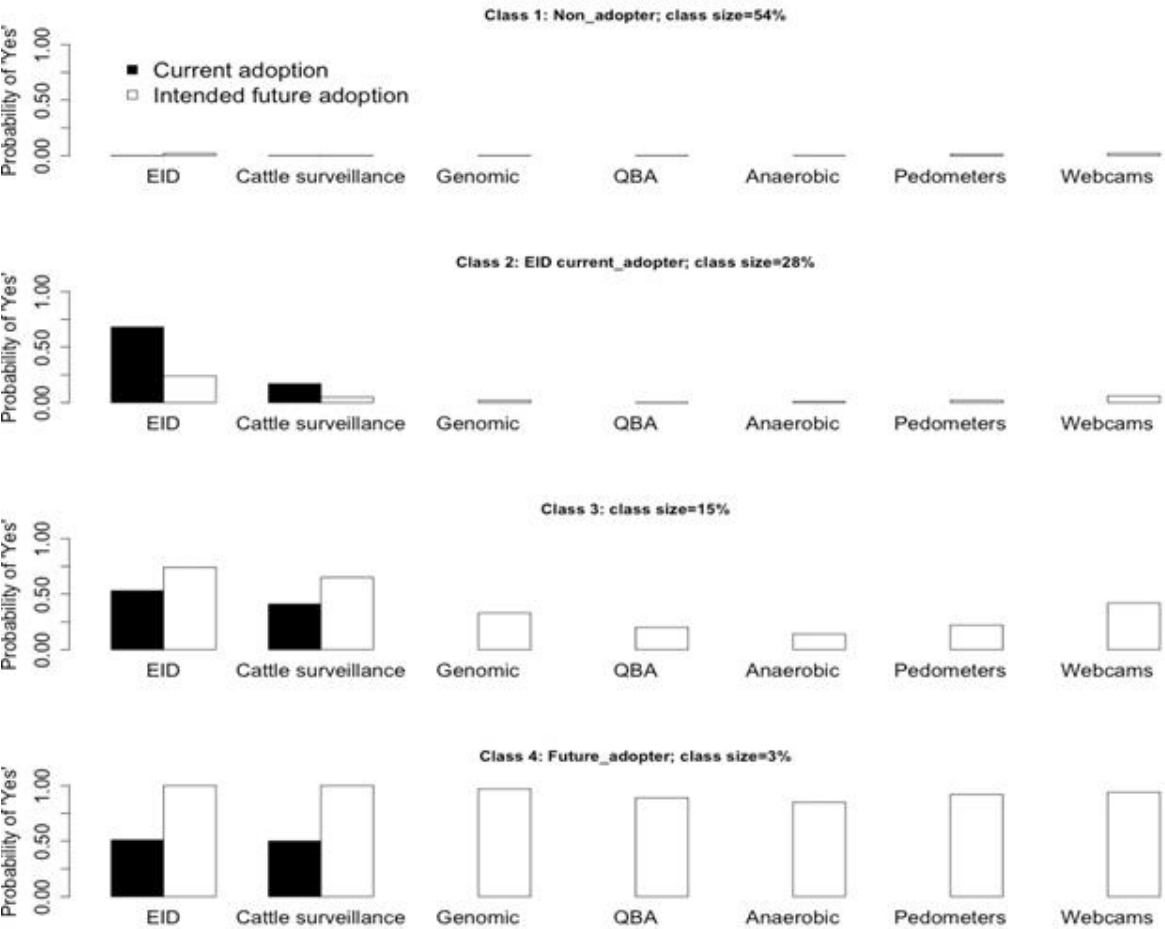

Supplement: Supplementary file [file 18947771]
